# Supplementary material for: Naphthoquinolizinium derivatives as a novel platform for DNA-binding and DNA-photodamaging chromophores
Source: Royal Society of Chemistry journal article supplement (doi:10.1039/b204275d), 2002-11-01
Supplement: b204275d(1).pdf [file b204275d%281%29.pdf]

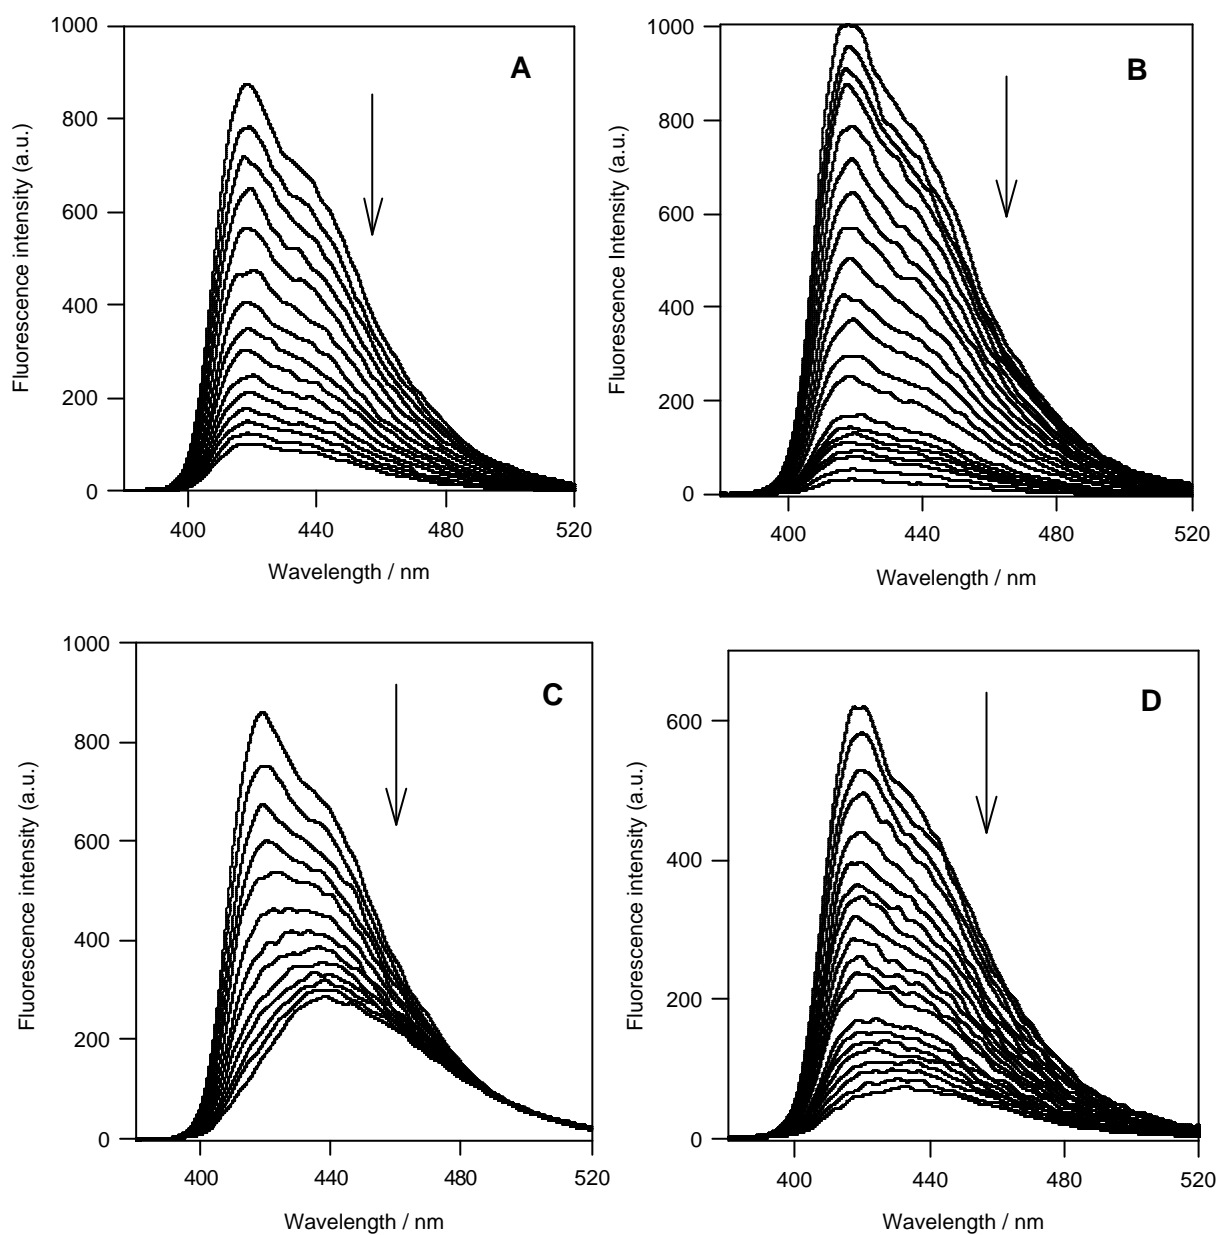

FIGURE S1: Fluorometric titration of st DNA (A), poly[dG-dC]<sub>2</sub> (B), poly[dA-dT]<sub>2</sub> (C), and poly[dI-dC]<sub>2</sub> (D) to compound **5a** ( $[5a] = 5 \times 10^{-6}$  M, in 0.01 M ETN buffer, pH = 7.0,  $T = 25$  °C)
