# Supplementary material for: Naphthoquinolizinium derivatives as a novel platform for DNA-binding and DNA-photodamaging chromophores
Source: Royal Society of Chemistry journal article supplement (doi:10.1039/b204275d), 2002-11-01

FIGURE S2: Fluorometric titration of st DNA (A), poly [dG-dC]<sub>2</sub> (B), poly[dA-dT]<sub>2</sub> (C), and poly[dI-dC]<sub>2</sub> (D) to compound 5b ([5b] = 5 × 10<sup>-6</sup> M, in 0.01 M ETN buffer, pH = 7.0, T = 25 °C)

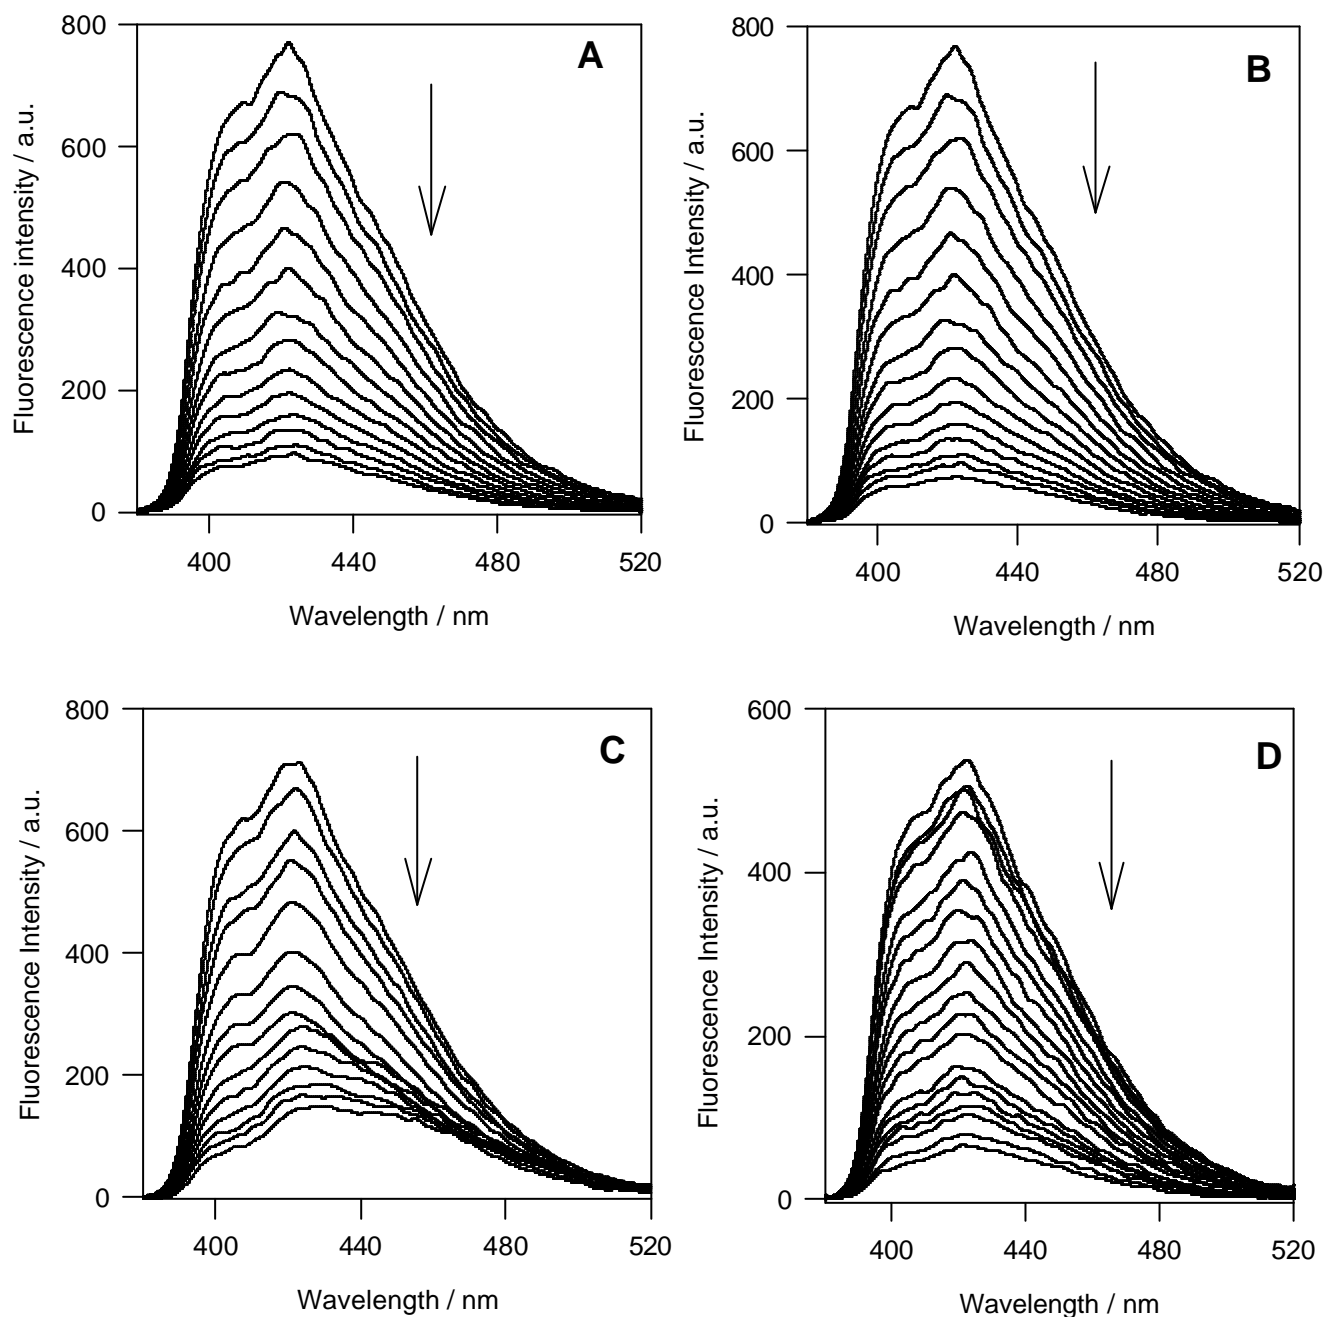

Supplement: b204275d(2).pdf [file b204275d%282%29.pdf]
