# Supplementary material for: Naphthoquinolizinium derivatives as a novel platform for DNA-binding and DNA-photodamaging chromophores
Source: Royal Society of Chemistry journal article supplement (doi:10.1039/b204275d), 2002-11-01

FIGURE S4: CD spectra of **5b** complexed with to (A) poly[dG-dC]<sub>2</sub>, (B) Poly[dA-dT]<sub>2</sub> and (C) Poly[dI-dC]<sub>2</sub> at different [Dye]/[DNA] ratios from a to d (a = 0.00, b = 0.08, c = 0.20, d = 0.40)

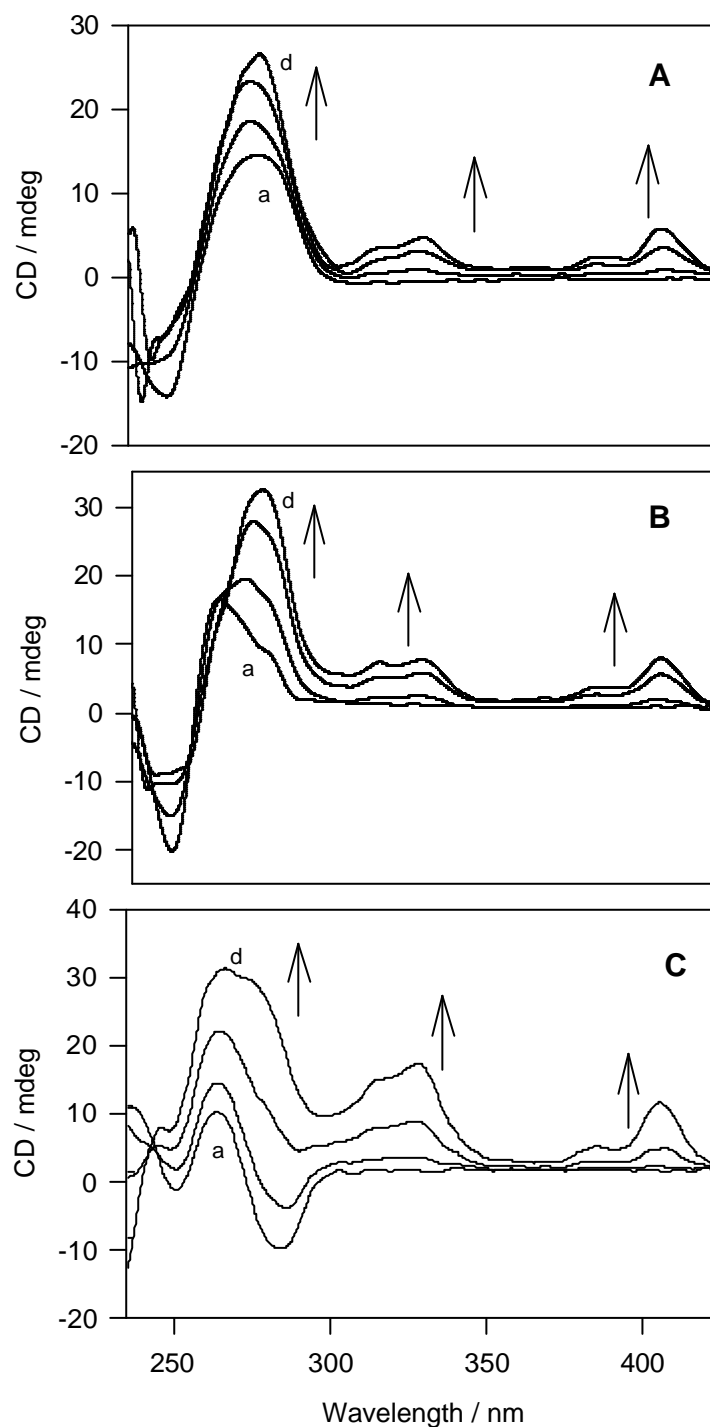

Supplement: b204275d(4).pdf [file b204275d%284%29.pdf]
